# Supplementary material
Source: publisher site journal article supplement (https://www.dovepress.com/article/100404)
Supplement: Supplementary file 1 [file get_supplementary_file.php]

## Supplementary material

### Synthesis of 3-((2-(Methacryloyloxy)ethyl)thio)propanoic Acid (BSMA)

*Synthesis of tert-Butyl-3-((2-Hydroxyethyl)thio)propanoate.* *tert*-Butyl acrylate (10.0 g, 78 mmol) and TEA (9.47 g, 93.6 mmol) were dissolved in anhydrous CH<sub>2</sub>Cl<sub>2</sub> (50 mL) and cooled to 0 °C in an ice-water bath. 2-Mercaptoethanol (6.1 g, 78 mmol) in anhydrous CH<sub>2</sub>Cl<sub>2</sub> (20 mL) was added dropwise over 30 min. Then the reaction mixture was stirred at ambient temperature overnight. The mixture was washed with saturated NH<sub>4</sub>Cl (3 x 100 mL) and NaCl solution, sequentially. The organic layer was collected and dried over anhydrous Na<sub>2</sub>SO<sub>4</sub>. After filtration, the filtrate was evaporated to dryness on a rotary evaporator. After drying in a vacuum oven overnight a colorless oil was obtained (14.2g, yield: 88.2%). <sup>1</sup>H NMR (CDCl<sub>3</sub>, δ, ppm, TMS; Figure S1a): 3.70-3.77 (2H, HOCH<sub>2</sub>CH<sub>2</sub>-), 2.70-2.79 (4H, -SCH<sub>2</sub>CH<sub>2</sub>OCO-), 2.50-2.55 (2H, HOCH<sub>2</sub>CH<sub>2</sub>S-), 2.18 (1H, HO-), and 1.46 (9H, -OCO(CH<sub>3</sub>)<sub>3</sub>).

*Synthesis of 2-((3-(tert-Butoxy)-3-Oxopropyl)thio)ethyl Methacrylate.* TEA (2.83 g, 28 mmol) and *tert*-butyl-3-((2-hydroxyethyl)thio)propanoate (5.0 g, 24 mmol) were dissolved in anhydrous CH<sub>2</sub>Cl<sub>2</sub> (40 mL) and cooled to 0 °C in an ice-water bath. Methacryloyl chloride (2.63 g, 25 mmol) in anhydrous CH<sub>2</sub>Cl<sub>2</sub> (15 mL) was then added dropwise over 30 min. The reaction mixture was stirred at 0 °C for 2 h and then overnight at room temperature. The mixture was filtered off, washed with saturated NaHCO<sub>3</sub> and further purified by neutral alumina column chromatography using CH<sub>2</sub>Cl<sub>2</sub> as the eluent. After drying in a vacuum oven overnight a colorless oil was obtained (5.75 g, yield: 75.4%). <sup>1</sup>H NMR (CDCl<sub>3</sub>, δ, ppm, TMS; Figure S1b): 5.57-6.11 (2H, CH<sub>2</sub>=C(CH<sub>3</sub>-), 4.30 (2H, -OCH<sub>2</sub>CH<sub>2</sub>-), 2.80 (4H, -SCH<sub>2</sub>CH<sub>2</sub>OCO-), 2.53 (2H, -C(=O)OCH<sub>2</sub>CH<sub>2</sub>S-), 1.94 (3H, CH<sub>2</sub>=C(CH<sub>3</sub>-), and 1.46 (9H, -OCO(CH<sub>3</sub>)<sub>3</sub>).

*Synthesis of 3-((2-(Methacryloyloxy)ethyl)thio)propanoic Acid (BSMA).* 2-((3-(tert-Butoxy)-3-oxopropyl)thio)ethyl methacrylate (3.0 g, 11 mmol) was dissolved in anhydrous CH<sub>2</sub>Cl<sub>2</sub> (5 mL). Then TFA (5 mL) was added. The reaction mixture was stirred at room temperature for 5 h and the mixture was evaporated to dryness on a rotary evaporator to afford BSMA (1.95 g, yield: 65%). <sup>1</sup>H NMR (CDCl<sub>3</sub>, δ, ppm, TMS, Figure S1c): 5.57-6.11 (2H, CH<sub>2</sub>=C(CH<sub>3</sub>-), 4.30 (2H, -OCH<sub>2</sub>CH<sub>2</sub>-), 2.81-2.90 (4H, -SCH<sub>2</sub>CH<sub>2</sub>OCO-), 2.70 (2H, -C(=O)OCH<sub>2</sub>CH<sub>2</sub>S-), and 1.94 (3H, CH<sub>2</sub>=C(CH<sub>3</sub>-).

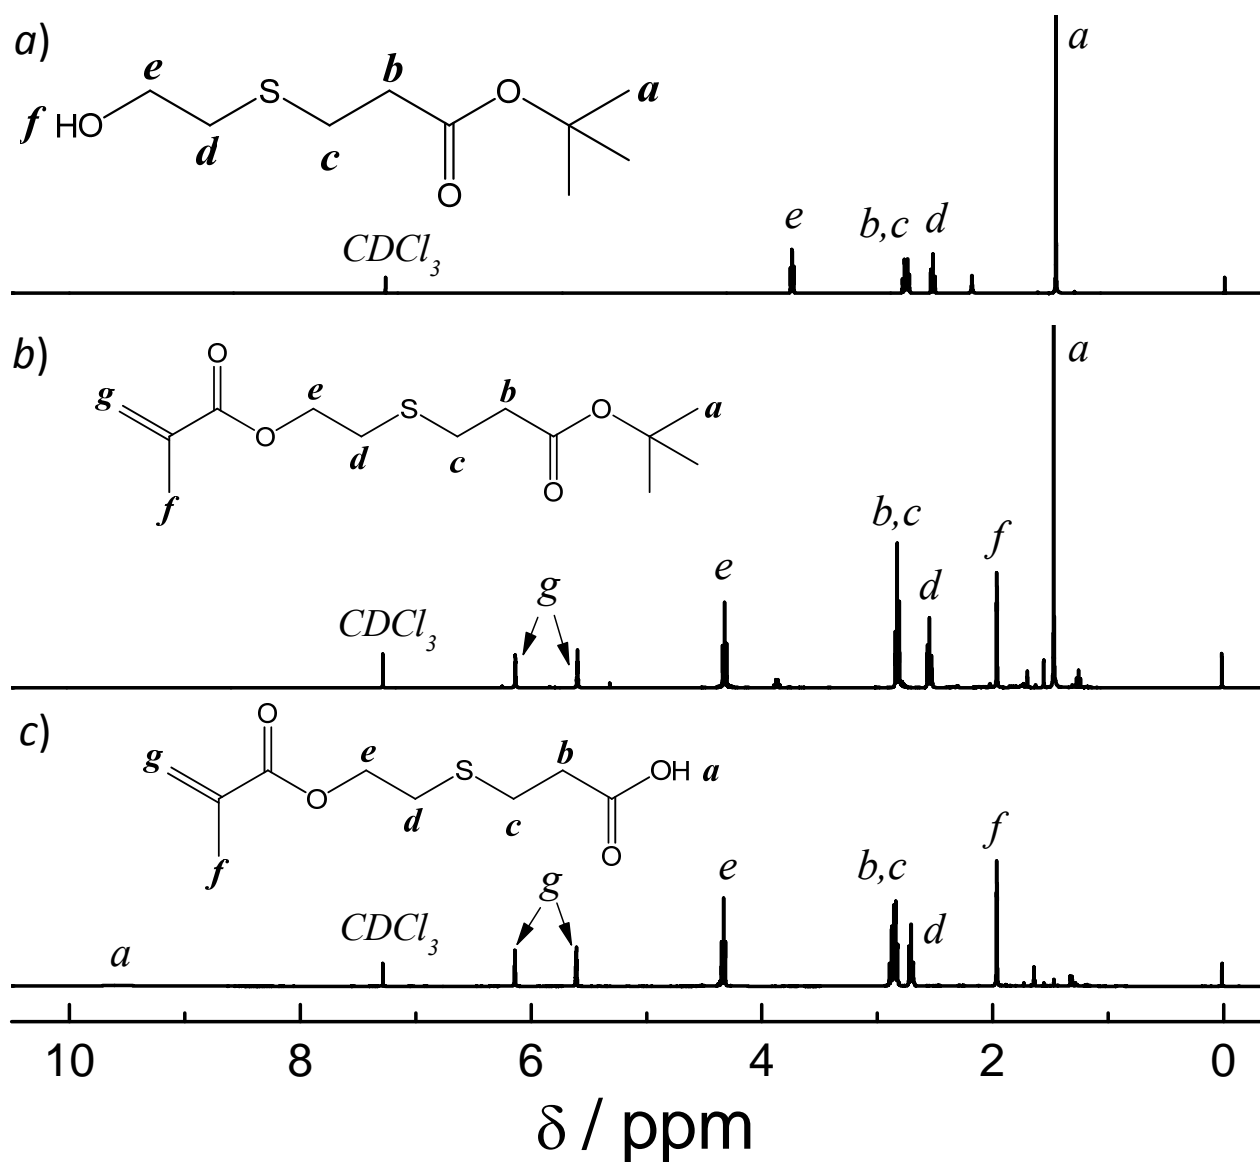

**Figure S1.**  $^1\text{H}$  NMR spectra recorded in  $\text{CDCl}_3$  for (a) *tert*-butyl-3-((2-hydroxyethyl)thio)propanoate, (b) 2-((3-(*tert*-butoxy)-3-oxopropyl)thio)ethyl methacrylate, and (c) 3-((2-(methacryloyloxy)ethyl)thio)propanoic acid (BSMA).

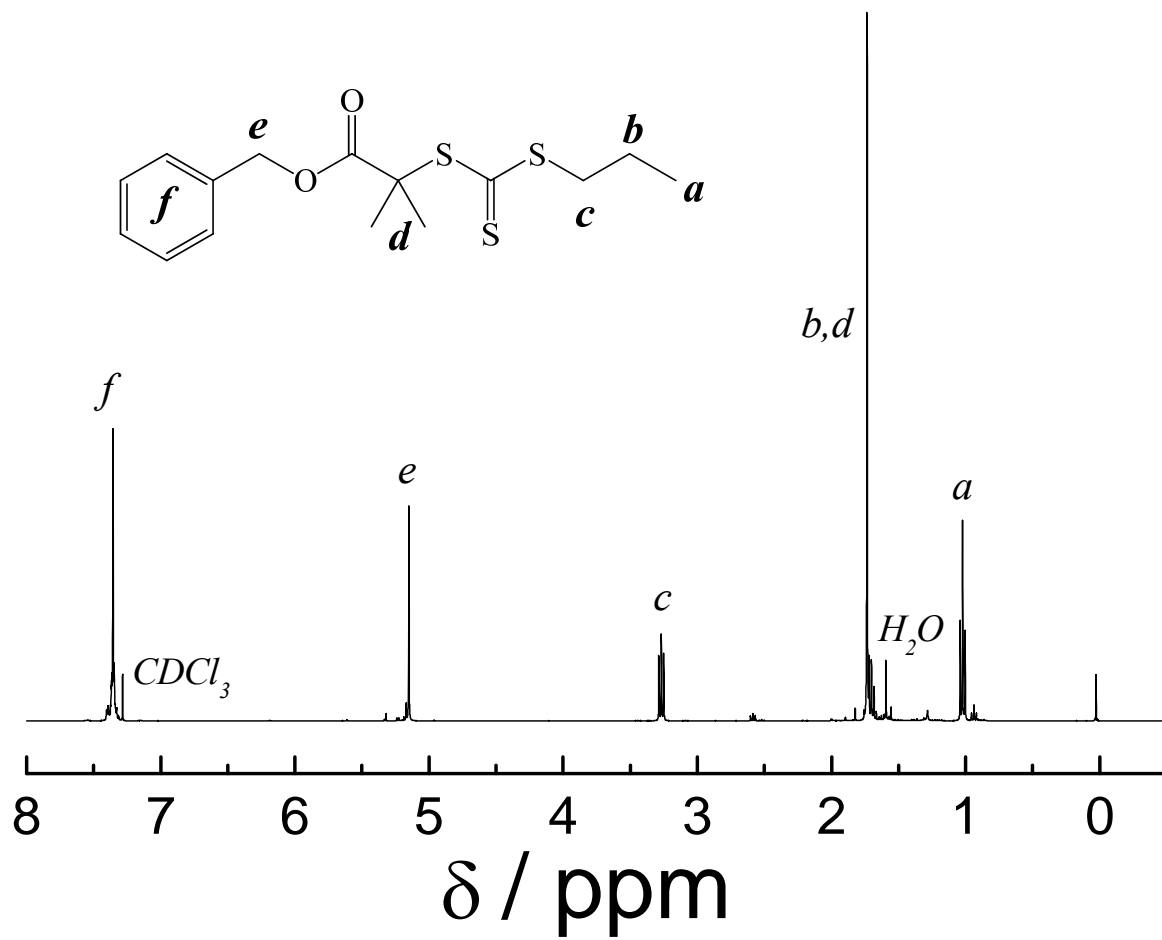

**Figure S2.** <sup>1</sup>H NMR spectrum recorded for BPTPA in CDCl<sub>3</sub>.

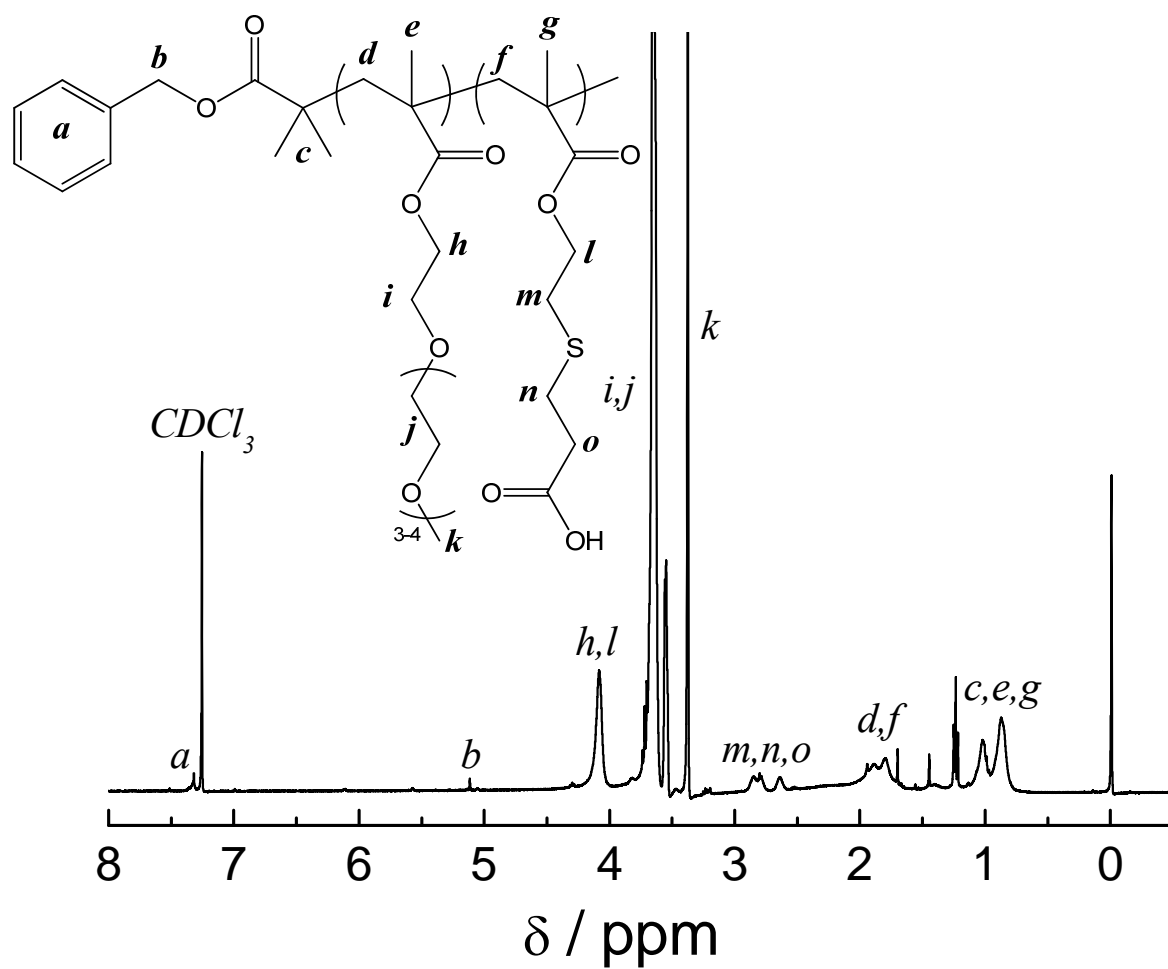

**Figure S3.**  $^1\text{H}$  NMR spectrum recorded for P(OEGMA-co-BSMA) in  $\text{CDCl}_3$ .

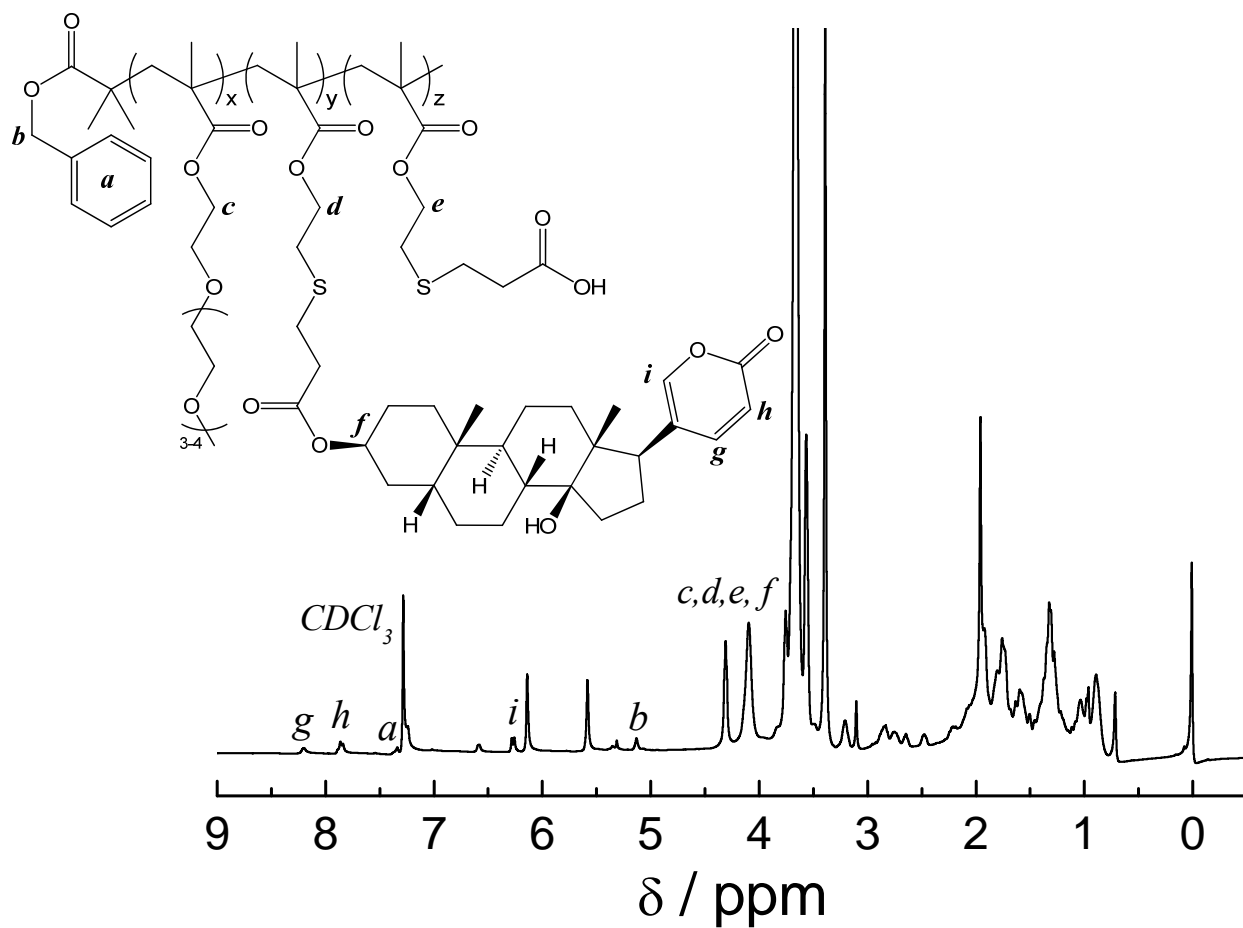

**Figure S4.**  $^1\text{H}$  NMR spectrum recorded for P(OEGMA-co-BUF-co-BSMA) in  $\text{CDCl}_3$ .

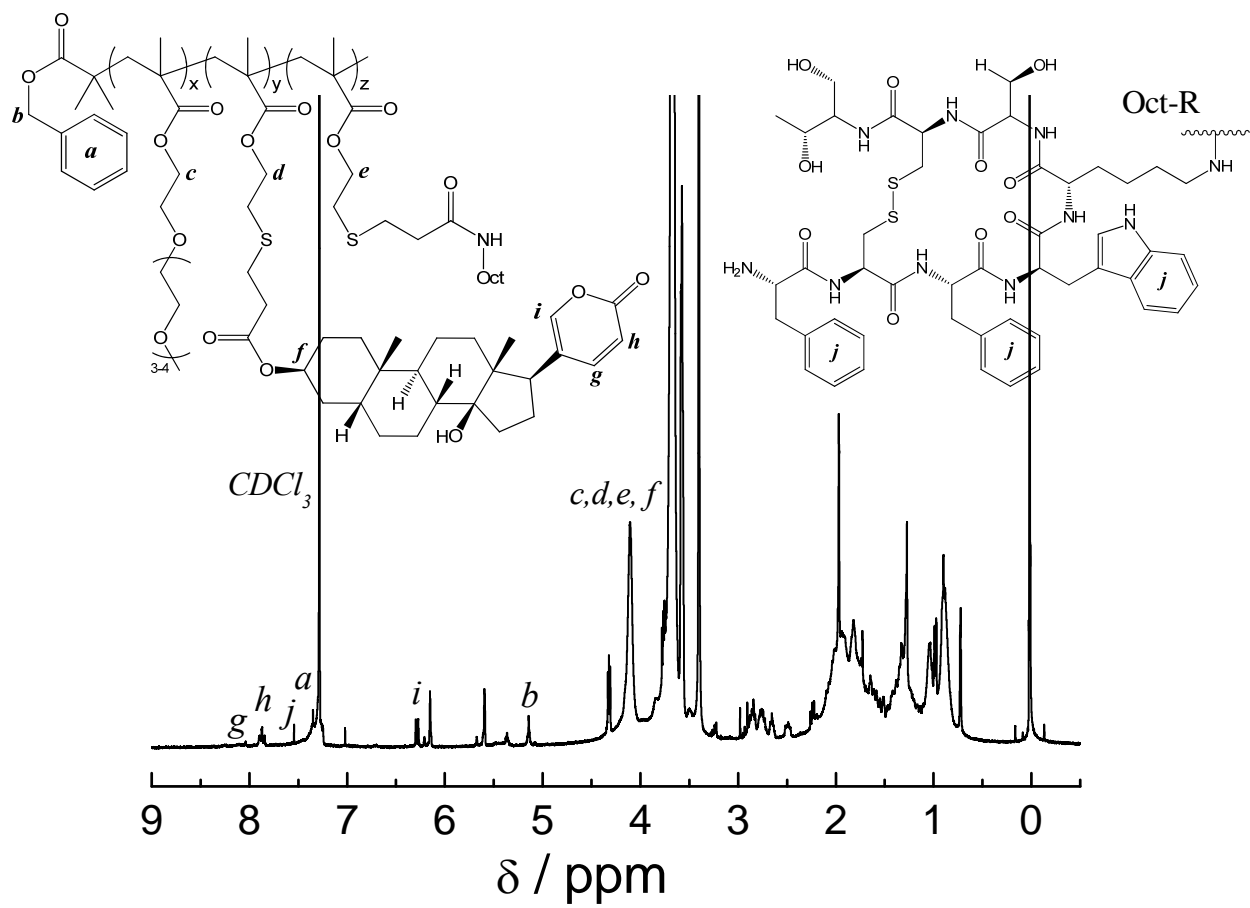

**Figure S5.**  $^1\text{H}$  NMR spectrum recorded for P(OEGMA-co-BUF-co-Oct) in  $\text{CDCl}_3$ .

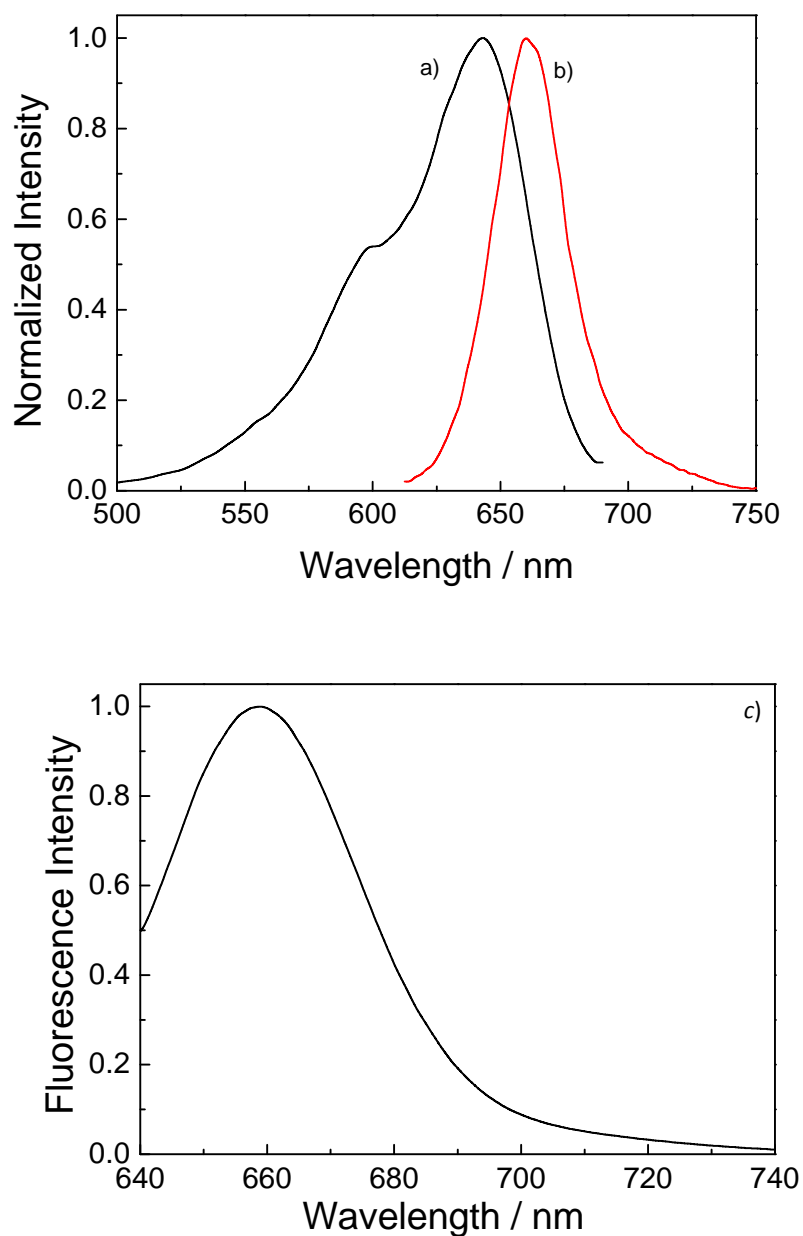

**Figure S6.** Fluorescence (a) excitation and (b) emission spectra recorded for P(OEGMA-*co*-BUF-*co*-Oct-*co*-Cy5) (0.1 g/L, [Cy5] =  $3.0 \times 10^{-6}$  M; slit widths: ex. 5 nm, em. 5 nm). (c) Fluorescence emission spectrum recorded for P(OEGMA-*co*-BUF-*co*-Cy5) (0.1 g/L, [Cy5] =  $3.0 \times 10^{-6}$  M;  $\lambda_{\text{ex}}$  = 633 nm, slit widths: ex. 5 nm, em. 5 nm).

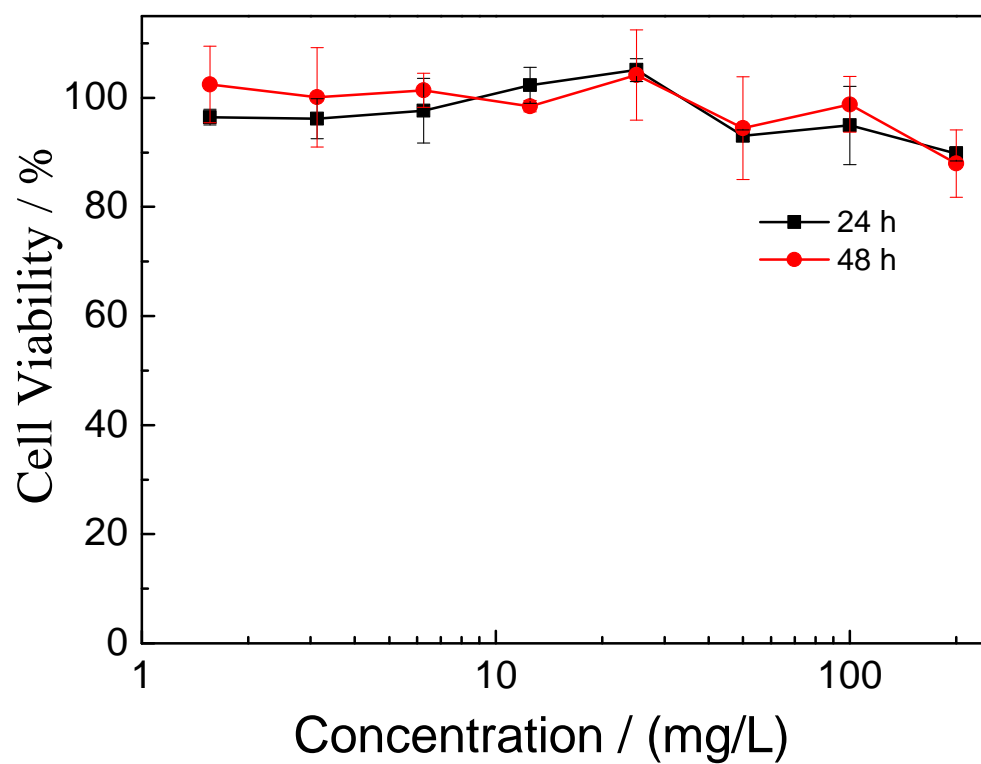

**Figure S7.** Viability of MCF-7 cells after incubation for 24 h and 48 h in the presence of P(OEGMA-*co*-Oct) at varying concentrations.



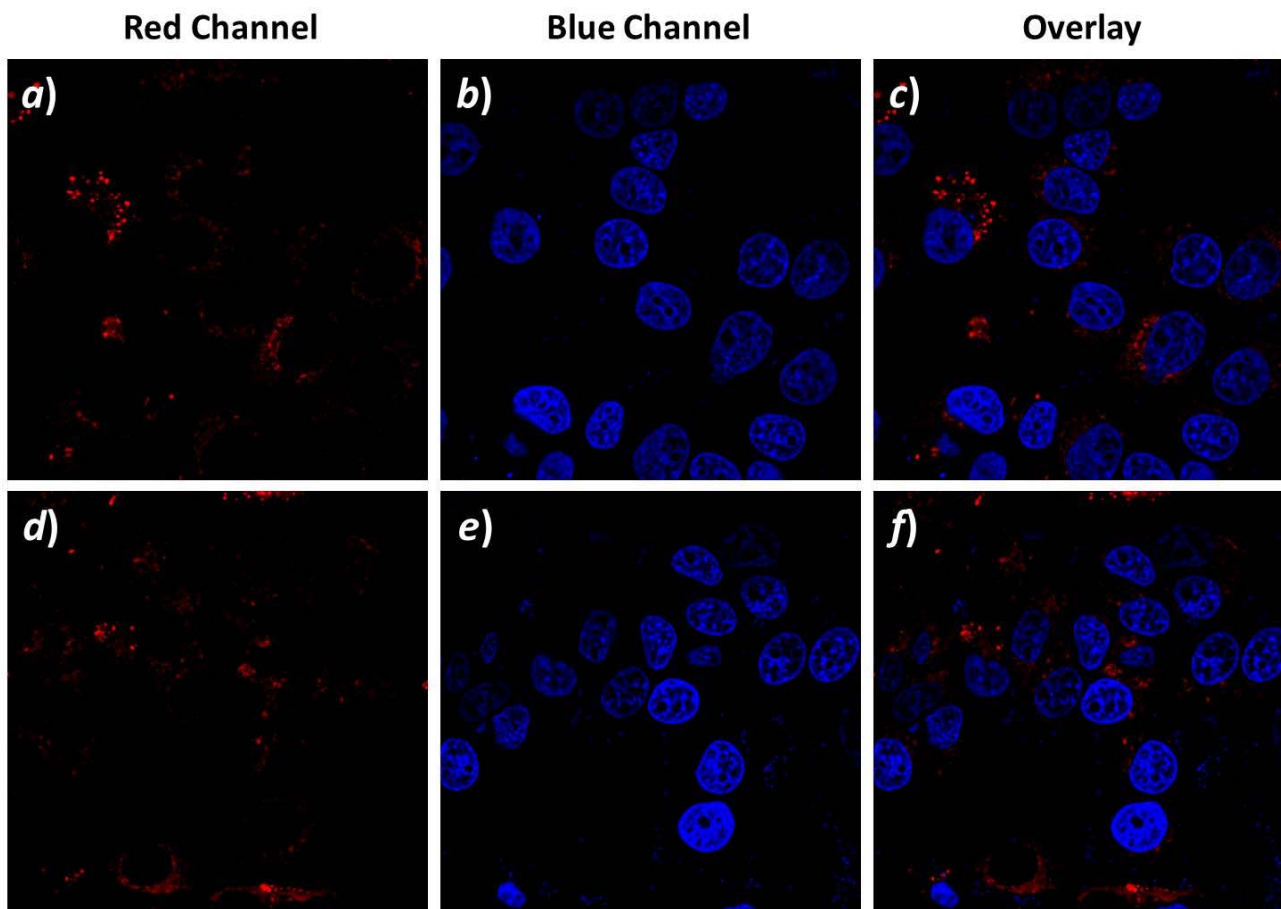

**Figure S8.** Typical confocal microscopy fluorescence images recorded for MDA-MB-231 cells after incubating at 37 °C with (top panel) P(OEGMA-*co*-BUF-*co*-Oct-*co*-Cy5) ([Cy5] =  $3.0 \times 10^{-6}$  M) and (bottom panel) P(OEGMA-*co*-BUF-*co*-Cy5) ([Cy5] =  $3.0 \times 10^{-6}$  M) for 4 h. (a and d) The red channel was excited at 633 nm and collected between 660-700 nm. (b and e) The cell nuclei were stained by DAPI and the blue channel was excited at 405 nm and collected between 420-460 nm. (c and f) Overlay of the blue and red channels.

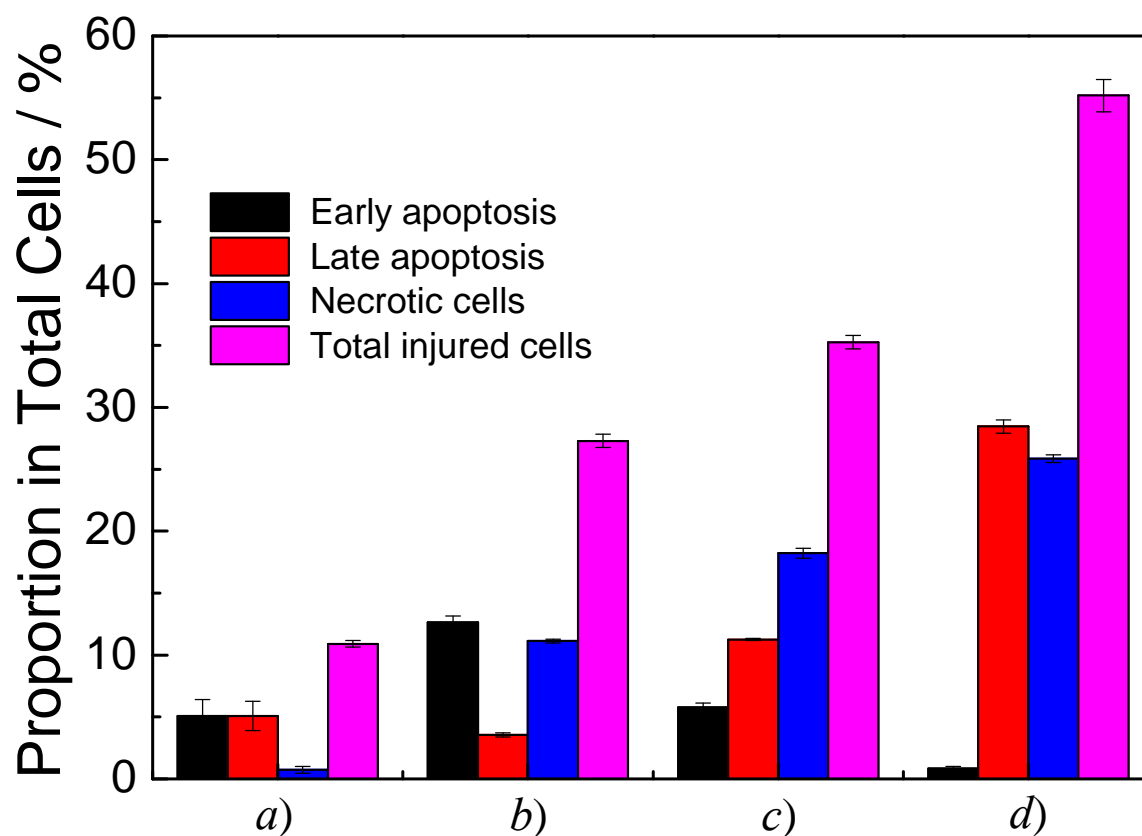

**Figure S9.** The proportion of early apoptosis, late apoptosis, and necrotic cells (a) untreated and treated with 50 nM BUF-equivalent dosage of (b) free BUF, (c) P(OEGMA-co-BUF), and (d) P(OEGMA-co-BUF-co-Oct) for 24 h were quantitatively summarized. Annexin-v FITC/PI double staining assay was employed to detect the apoptosis of cells.

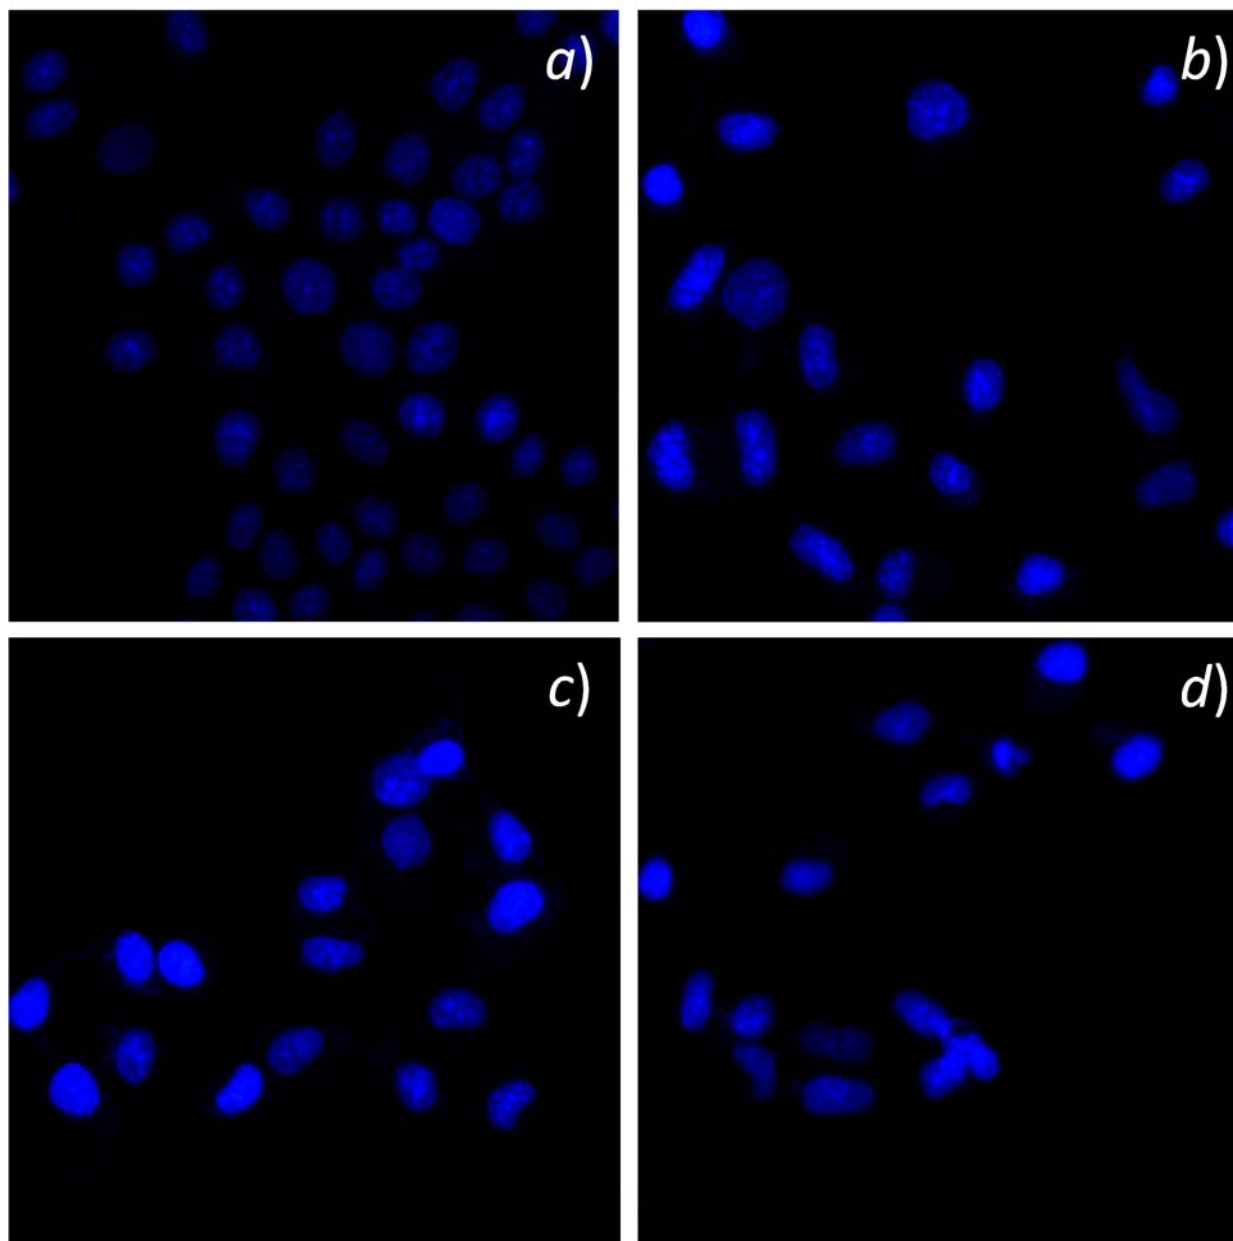

**Figure S10.** BUF-containing polymeric micelles induced apoptosis of MCF-7 cells as detected by DAPI nuclear staining (excitation: 405 nm; blue channel: 440-480 nm). Typical CLSM images of MCF-7 cells after incubation for 24 h in the (a) absence and presence of 50 nM BUF-equivalent dosage of (b) free BUF, (c) P(OEGMA-*co*-BUF), and (d) P(OEGMA-*co*-BUF-*co*-Oct).

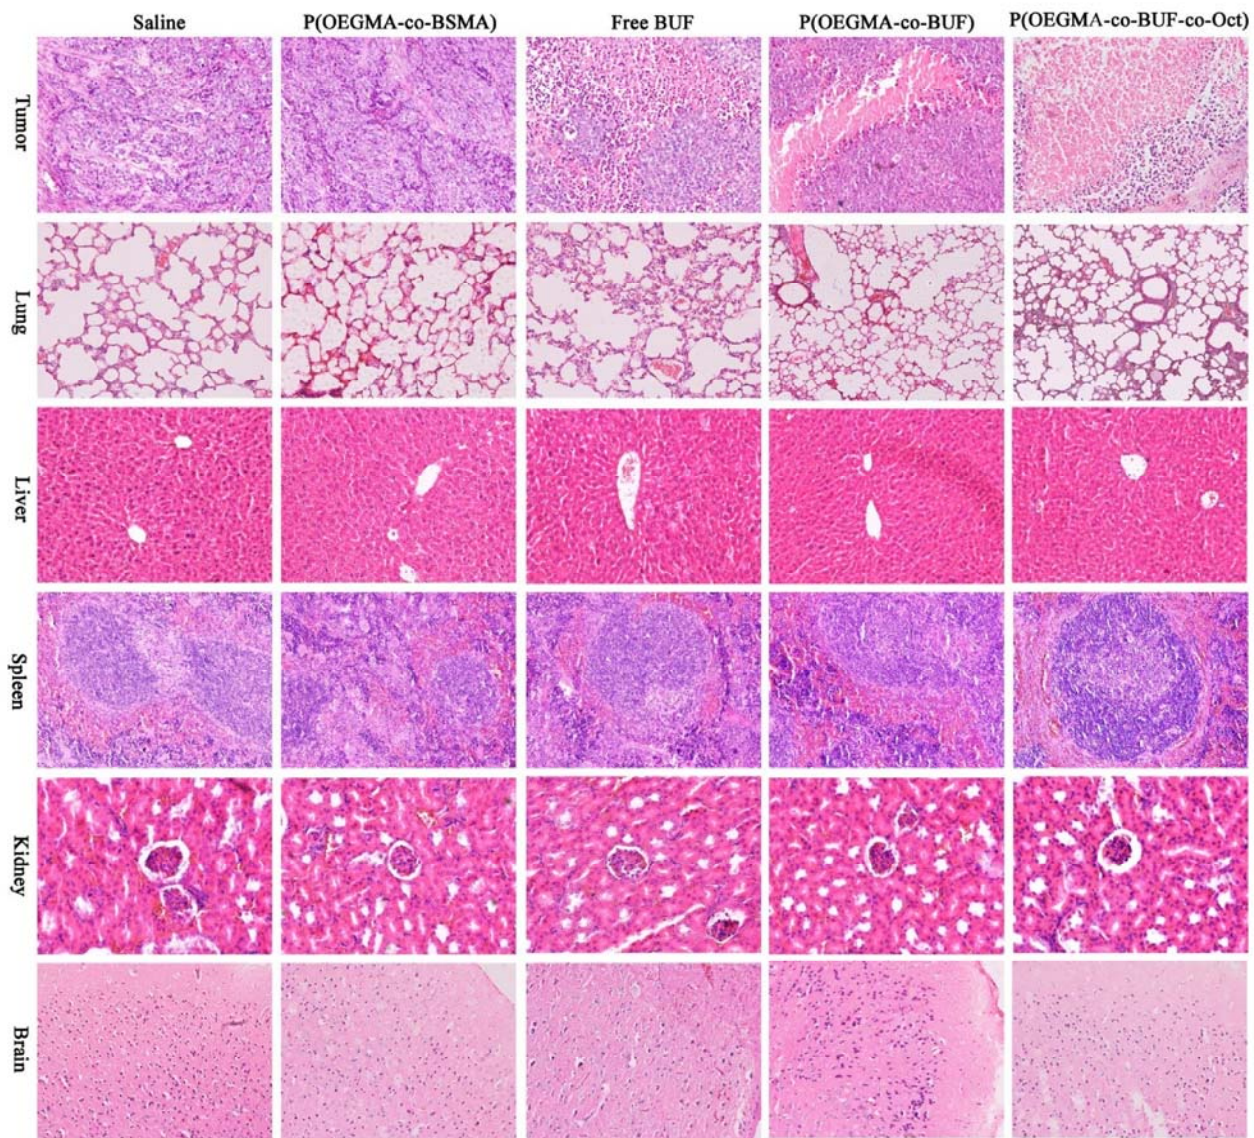

**Figure S11.** HE staining of tumor tissues after receiving the treatment of saline, P(OEGMA-co-BSMA), BUF, P(OEGMA-co-BUF), and P(OEGMA-co-BUF-co-Oct).
